# Supplementary material for: Complete Analysis of the Epidemiological Scenario around a SARS-CoV-2 Reinfection: Previous Infection Events and Subsequent Transmission
Source: PubMed Central journal article supplement (PMC8550076; doi:10.1128/msphere.00596-21), 2021-09-08

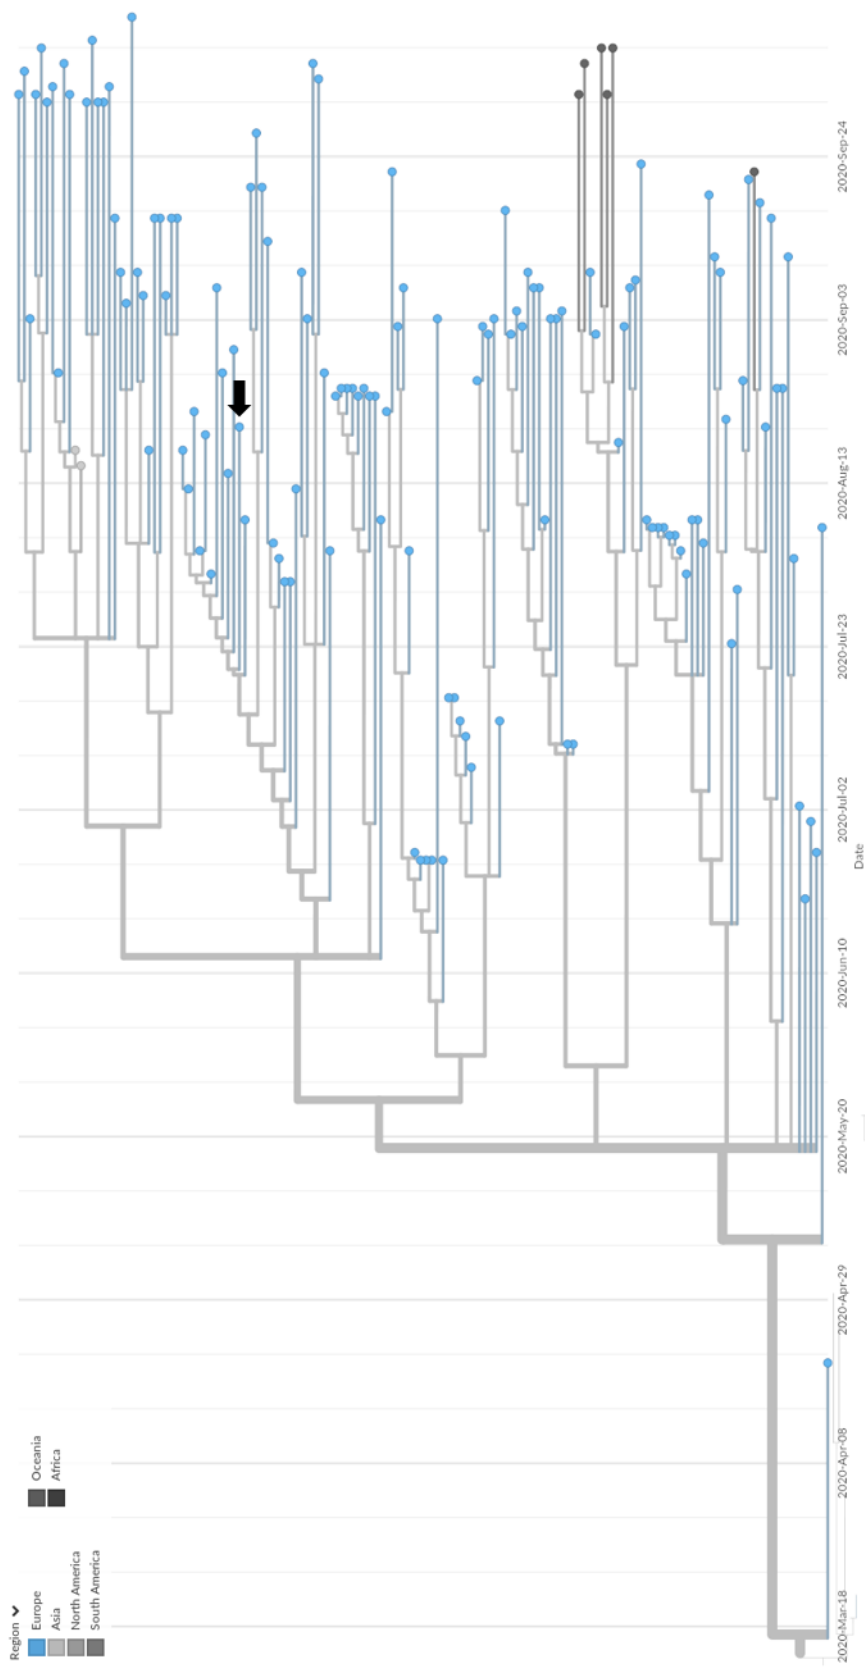

Supplement: msphere.00596-21-sf002.pdf [file msphere.00596-21-sf002.pdf]
